# Supplementary material for: Advances in Soil Moisture Retrieval from Multispectral Remote Sensing Using Unmanned Aircraft Systems and Machine Learning Techniques
Source: Copernicus journal article supplement (doi:10.5194/hess-2020-271), 2020-08-18
Supplement: Supplementary file [file hess-2020-271-RC1-supplement.pdf]

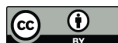

# Advances in Soil Moisture Retrieval from Multispectral Remote Sensing Using Unmanned Aircraft Systems and Machine Learning Techniques

Samuel N. Araya<sup>1</sup>, Anna Fryjoff-Hung<sup>2</sup>, Andreas Anderson<sup>2</sup>, Joshua H. Viers<sup>2,3</sup>, and Teamrat A. Ghezzehei<sup>2,4</sup>

5 <sup>1</sup>Earth System Science, Stanford University, Stanford, CA, USA

<sup>2</sup>Center for Information Technology in the Interest of Society and the Banatao Institute, University of California, Merced, CA, USA

<sup>3</sup>Department of Civil and Environmental Engineering, University of California, Merced, CA, USA

<sup>4</sup>Life and Environmental Science, University of California, Merced, CA, USA

10 *Correspondence to:* Samuel N. Araya (araya@stanford.edu)

**Abstract.** We developed machine learning models to retrieve surface soil moisture (0 – 4 cm) from high-resolution multispectral imagery using terrain attributes and local climate covariates. Using a small unmanned aircraft system (UAS) equipped with a multispectral sensor we captured high-resolution imagery in part to create a high-resolution digital elevation model (DEM) as well **as quantify relative vegetation photosynthetic status**. We tested four different machine learning algorithms. The **boosted regression tree algorithm** gave the best prediction with **mean absolute error of 3.8 %** volumetric water content. The most important variables for the prediction of soil moisture were precipitation, reflectance in the red wavelengths, potential evapotranspiration, and topographic position indices (TPI). Our results demonstrate that the dynamics of soil water status across heterogeneous terrain may be adequately described and predicted by UAS remote sensing data and machine learning. Our modeling approach and the variable importance and relationships we have assessed in this study should be useful  
20 for management and environmental modeling tasks where spatially explicit soil moisture information is important.

## List of Acronyms

|        |                                        |
|--------|----------------------------------------|
| ALE    | Accumulated local effects              |
| ANN    | Artificial neural network              |
| BRT    | Boosted regression trees               |
| 25 DEM | Digital elevation model                |
| MAE    | Mean absolute error                    |
| MBE    | Mean bias error                        |
| NDVI   | Normalized difference vegetation index |
| NIR    | Near-infrared                          |
| 30 PET | Potential evapotranspiration           |
| RF     | Random forest                          |
| RMSE   | Root mean square error                 |
| RVR    | Relevance vector regression            |
| SVR    | Support vector regression              |

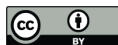

|    |      |                                      |
|----|------|--------------------------------------|
| 35 | TDR  | Time-domain reflectometry            |
|    | TPI  | Topographic position index           |
|    | TTVI | Thiam's Transformed vegetation index |
|    | UAS  | Unmanned aircraft systems            |

## 40 **1 Introduction**

The relatively small quantity of water stored in the upper layers of soil plays a key role in terrestrial biology, biogeochemistry, and atmospheric water and energy fluxes. More than half of the solar energy absorbed by the land surface is used to evaporate water (Trenberth et al., 2009) and about 60% of terrestrial precipitation is returned to the atmosphere by evapotranspiration (Seneviratne et al., 2010).

45 In most environments, soil water storage mainly depends on precipitation and evapotranspiration (Hillel, 1998; Rana and Katerji, 2000), but the distribution of water in the soil is also dependent on the soil hydraulic properties, topography, and other environmental and underground conditions. Therefore, there is no straightforward or accurate method to estimate soil water.

It is very difficult, or even impractical, to acquire data on soil water dynamics by direct measurement over large scales, and there is no robust approach to predict it. The scarcity of soil moisture observations is a major impediment for the investigation of soil moisture-climate interaction. New techniques to large-scale measurement of soil moisture include the cosmic-ray soil moisture observing system, **COSMOS**, and the GPS interferometric reflectometry (GPS-IR) based methods. The COSMOS employs a network of probes across the U.S. that estimate soil moisture by measuring cosmic-ray neutron radiation intensity above the land surface (Zreda et al., 2012). GPS based methods are also able to estimate soil moisture of a few square meters using GPS signal reflected from the soil. For these new techniques, the empirical confirmation of theoretical predictions of variable measurement depth and standardization of procedures still need to be refined (Ochsner et al., 2013). Remote sensing techniques can fill the need for spatial coverage. The availability and accuracy of satellite remote sensing technologies have been steadily increasing over the years. However, satellite remote sensing methods are often constrained by their spatial and temporal resolution and shallow depth of measurement (Nichols et al., 2011).

Remote sensing methods of retrieving soil moisture provide an alternative to conventional methods of soil moisture measurement, which are impractical at large scales. Furthermore, they enable spatially distributed and frequent observations over a large area, which is difficult to achieve using conventional field measurements (Barrett and Petropoulos, 2014; Petropoulos et al., 2015). A critical challenge to current remote sensing methods of retrieving soil moisture is the lack of imagery with optimum spatial resolutions appropriate for field-scale soil moisture studies and the low re-visit frequency of satellites (Barrett and Petropoulos, 2014; Das and Mohanty, 2006). Alternatives based on manned airborne platforms are

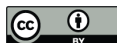

65 limited due to their high operational costs. Another significant challenge to remote sensing methods is estimating the root-zone soil moisture using surface observation obtained from remote sensing. (Nichols et al., 2011; Ochsner et al., 2013)

Several remote sensing methods, particularly from spaceborne deployment, have been developed to retrieve soil moisture using optical, thermal infrared, and microwave sensors.

70 The retrieval of information from measurements performed by remote sensing is based on the principle that changes in the chemical, physical and structural characteristics of a target determine the variations of its electromagnetic response (Schanda, 1986). The task of retrieving information from remote sensing is complicated by several factors. Ali et al. (2015) outline four general challenges of the retrieval problems: (i) the often complex and non-linear relation between remote sensing measurement and target variables of interest; (ii) the ill-posed nature of the retrieval problem in that electromagnetic response of a target is typically the result of contributions from multiple target variables and similar electromagnetic responses may be associated with different physical variables; (iii) the mixed contribution of multiple objects represented within elementary resolution cell; and (iv) the influence of external disturbing factors such as noise, radiation components coming from surrounding of the investigated area and the atmosphere.

80 Soil moisture retrieval from remote sensing has traditionally been addressed based on either empirical approaches or approaches based on an inversion of physical models. More recently, the use of machine learning techniques gained increased attention because of its ability to tackle many of the limitations with the empirical and physical-based models.

The approaches based on physical models are based on the physical description of the mechanisms involving the interaction of electromagnetic radiation and the target variable. A wide variety of analytic electromagnetic models have been proposed in the literature. The thermal inertia approach (Price, 1977) is one such method that is most commonly used for soil moisture retrieval using thermal infrared (wavelengths between 3.5 and 14  $\mu\text{m}$ ) observation (Barrett and Petropoulos, 2014; Zhang and Zhou, 2016). Many new soil thermal inertia estimation methods continue to be developed (Price, 1985; Tian et al., 2015; Zhang and Zhou, 2016). The advantages of such physically based models are that they can operate in more general scenarios that are difficult to represent through the collection of in situ measurements. However, such models rely on simplifying the representation of a real phenomenon, which can reduce reliability. The increased complexities of more through analytical models and the need for a large number of input parameters is a drawback for analytical models (Zhang and Zhou, 2016).

90 Empirical modeling approaches employ statistical regression techniques to develop a mapping function based on couples of in situ measurements of the target variable and corresponding remote sensing measurement (Ali et al., 2015). Water is one of the most significant chromophores in soils and studies have shown that narrow band spectral information in the visible (0.4 – 0.7  $\mu\text{m}$ ), near-infrared (0.7 – 1.1  $\mu\text{m}$ ) and shortwave infrared (1.1 – 2.5  $\mu\text{m}$ ) regions can be used to estimate surface soil moisture



95 (Ben-Dor et al., 2009; Malley et al., 2004). Soil reflectance in the visible to shortwave infrared spectral region generally decreases with an increase in soil moisture, with some parts of the spectrum showing a more pronounced decrease than others (Haubrock et al., 2008; Weidong et al., 2002). The hydroxide bond is the strongest absorber in the near-infrared region and free water in soil pores has strong absorption around 1.4 and 1.9  $\mu\text{m}$  wavebands (Malley et al., 2004). Several hyperspectral techniques to estimate soil moisture content have been developed such as the Soil Moisture Gaussian Model (SMGM) (Whiting et al., 2004) and the Normalized Soil Moisture Index (NSMI) (Haubrock et al., 2008).

100 In the presence of vegetation cover, however, the ability to use soil reflectance to measure soil moisture is limited (Muller and Décamps, 2000). In addition, soil reflectance of solar radiation represents only the upper 50  $\mu\text{m}$  of soil, and this makes it challenging to estimate moisture conditions in deeper layers (Malley et al., 2004). Most soil moisture remote sensing approaches operating in the optical range **relay** on developing an empirical spectral vegetation index (Barrett and Petropoulos, 2014). Several soil moisture measurement methods based on vegetation index proxies have been suggested as vegetation  
105 indexes are extremely sensitive to water stress, and they allow indirect estimates of soil moisture (Zhang and Zhou, 2016). Many studies have focused on deriving surface soil moisture content from synergistic use of remote sensing data acquired simultaneously in the optical and thermal infrared spectrum. The so-called ‘universal triangular relationship’ is a widely used method for estimating soil moisture (Nichols et al., 2011; Sobrino et al., 2014).

110 The advantage of empirical relationships is that they are typically fast to derive and do not require too many inputs (Ali et al., 2015). The disadvantages of empirical models are the need for higher quality ground measurement, which could be time consuming and expensive, and that the derived relationship is typically site and sensor dependent which limits the possibility to extend their use in a different area readily.

115 Some disadvantages specific to remote sensing methods in the optical and thermal infrared spectrum are the fact that these wavelengths have shallow soil penetration and require cloud-free conditions. Many of the optical and thermal infrared synergistic approaches require a wide range of both vegetation index and soil moisture conditions within a study region which cannot always be satisfied (Barrett and Petropoulos, 2014).

120 The advantages of machine learning techniques in remote sensing are their ability to learn and approximate complex non-linear mappings and the fact that no assumptions need to be made about data distribution. They can thus integrate data from different sources with poorly-defined or unknown probability density functions (Ali et al., 2015). Machine learning techniques have often been shown to outperform other parametric approaches (Ali et al., 2015; Paloscia et al., 2008). Furthermore, machine learning techniques improve with an increasing number of observed datasets. Some of the limitations of machine learning methods are the need for a large number of training data, which require extensive ground truth datasets, and that machine learning methods are black boxes and only limited inference can be made about the relationships of different inputs.



125 Remote sensing from unmanned aircraft systems (UAS) has the potential to address several limitations of traditional remote sensing. The most attractive feature of UASs is their high spatial resolution, frequent or on-demand image acquisition, and low operating costs (Anderson and Gaston, 2013; Berni et al., 2009; Colomina and Molina, 2014; Elarab, 2016). UAS is an umbrella term that refers to the unmanned aircraft and the complementary ground control and communication systems necessary for air surveys (Singh and Frazier, 2018).

### 1.1 Objectives

130 The purpose of this research was **to advance soil moisture change measurement, process understanding**, and prediction using remote sensing products from UAS and machine learning methods. In this study, the spatial and temporal scale limitations were addressed by deploying multispectral remote sensing with small UAS and address the challenge of retrieving surface soil moisture changes using machine learning methods and fusing remote sensing data with ground data and meteorological data.

135 The specific goals of this study were to: (1) develop an adaptable method to retrieve information on surface soil moisture from small UAS remote sensing products and machine learning methods, (2) identify important reflectance and surface characteristics for the prediction of soil moisture changes (3) identify appropriate spatial resolutions of reflectance images and terrain variables for estimating soil moisture, and (4) explore the relation of soil moisture to surface properties.

## 2 Background on The Machine Learning Algorithms Used

140 Several machine learning algorithms exist for multivariate regression modeling. Artificial neural networks (ANN) are among the most commonly used algorithms for the retrieval of soil moisture from remote sensing (e.g., Hassan-Esfahani et al., 2015; Paloscia et al., 2008). In recent years, the support vector machine (SVM) and the similar support vector regression (SVR) algorithms have become popular in the retrieval of soil moisture (e.g., Ahmad, Kalra, & Stephen, 2010; Zaman & Mckee, 2014; Zaman, McKee, & Neale, 2012). Other popular machine learning algorithms include tree-based models such as the random forest (RF) and boosted regression trees (BRT).

### 2.1 Artificial Neural Network (ANN)

145 ANN models have been widely used in the development of PTFs (Matei et al., 2017; Pachepsky et al., 1996; Schaap et al., 2001; Zhang et al., 2018; Zhang and Schaap, 2017). ANNs are universal approximators that can approximate any nonlinear mapping. The feed-forward neural network is a popular variant of ANN. In this study, **we implemented the feed-forward neural networks with a single hidden layer**

### 2.2 Support Vector Regression (SVR)

150 SVR is an adaptation of the support vector machine (SVM) for regression problems (Cortes and Vapnik, 1995; Drucker et al., 1997). The SVM learning is a generalization of ‘maximal margin classifier.’ The algorithm first maps the input variables into



a high-dimensional space using a fixed mapping function—a kernel function. The algorithm then constructs hyperplanes, which can be used for classification or, in the case of SVR, for regression. In this study, we use the Radial Basis Function kernel, which is one of the most commonly used kernels in SVR. Some advantages of SVR include the fact that they do not suffer from the problem of local minima, and that they have few parameters to tune when training the model.

### 2.3 Relevance Vector Regression (RVR)

Like SVM, the RVR originally introduced as a classification machine (Tipping, 2000). RVR is a Bayesian treatment of the SVM prediction function which avoids some of the limitations of SVM algorithms, such as reducing the use of basis functions and the need for optimizing the cost and the insensitivity parameters (Ben-Shimon and Shmilovici, 2006). Torres-Rua et al. (2016) successfully used the RVR algorithm to estimate surface soil moisture from satellite image and **energy balance products**.

### 2.4 Random Forest (RF)

RF are popular models that are relatively simple to train and tune (Hastie et al., 2009). They apply ensemble techniques by averaging a large number of individual decision tree-based models. Tree models are ‘grown’ by searching for a predictor that ensures the best split that results in the smallest model error. The individual trees in RF ensemble are built on bootstrapped training sample, and only a small group of predictor variables are considered at each split, this ensures that trees are decorrelated with each other (Breiman, 2001; James et al., 2013).

### 2.5 Boosted Regression Trees (BRT)

BRT is another form decision tree model ensemble enhanced by the gradient boosting approach. The gradient boosting algorithm constructs additive regression models by sequentially fitting ‘simple base learner’ functions (i.e., decision trees) to current pseudo-residuals at each iteration (Friedman, 2002). These pseudo-residuals are the gradient of the loss function being minimized. BRT models have shown considerable success and often outperform other machine learning algorithms in many situations (Elith et al., 2008; Natekin and Knoll, 2013). BRT models are also particularly adept for less-than-clean data (Friedman, 2001), which makes them particularly attractive in our work where the training data is compiled from various sources and different measurement methods which makes it prone to some inconsistencies.

Tree-based models, both the RF and BRT, have the advantage of being able to rank predictor variable’s relative importance. In these models, the approximate relative influence of a single predictor variable is calculated as the empirical improvement of predictions by splitting on that predictor at each node and then averaging the relative influence of the variable across all trees of the model (Ridgeway, 2012).

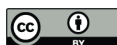

### 180 3 Methods

Multispectral images of the study area were collected on six different days throughout the 2018 water year using a UAS equipped with a multispectral camera. High-resolution digital elevation model (DEM) was generated from the **stereo images** using photogrammetric software, and multiple sets of terrain variables were calculated. Concurrently with the image acquisition flights, moisture content of top 3.8 cm of soil was measured at predefined sampling locations. The ground soil moisture measurements, multispectral reflectance, terrain variables, and rainfall and potential evapotranspiration (PET) data were then aggregated into a data table and used to train a machine learning model to predict the soil moisture. Figure 1 shows the model building process.

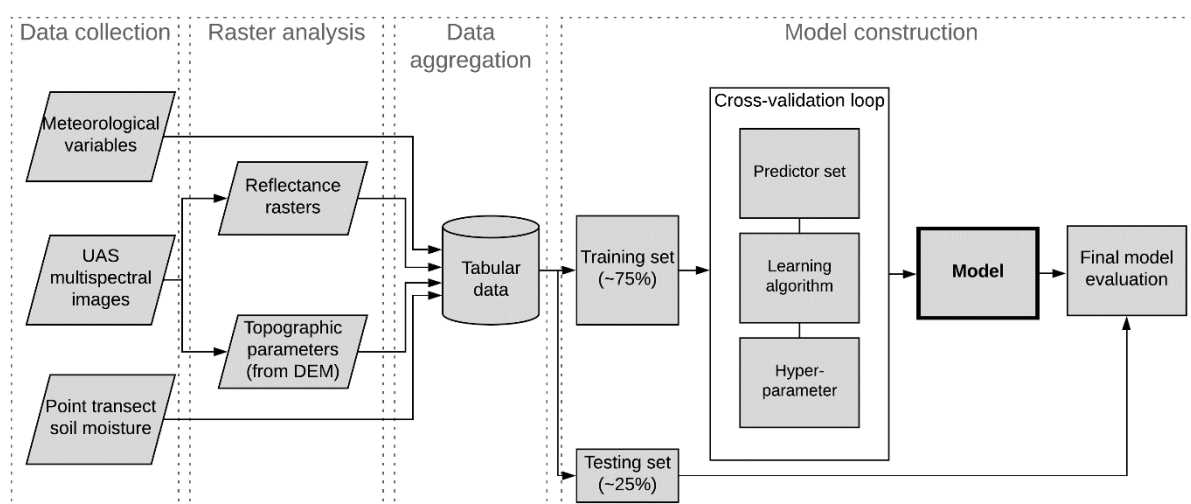

190 **Figure 1 Process flowchart of model development.**

#### 3.1 Study Site

The study was conducted in a small grassland catchment at the Merced Vernal Pools and Grassland Reserve located about five kilometers northeast of the City of Merced, California. Located at the Central Valley of California, the study site has a Mediterranean climate with hot, dry summers and cool, wet winters with an average annual precipitation of 330 mm.

195 The Merced Vernal Pools and Grassland reserve covers an area of about 26.6 km<sup>2</sup> and protects hundreds of ephemeral pools and wetlands (Wong, 2014). The reserve was historically and still is used for livestock grazing.

Our study site is a 0.6 km<sup>2</sup> area of land located within a sub-catchment that contributes to the Avocet Pond, a large stock pond located in the northeast corner of the Reserve (Figure 2). The catchment was selected because of an extensive hydrologic



200 modeling study that was being conducted on the site at the time (Fryjoff-Hung, 2018). We studied a small subset of an area investigated by Fryjoff-Hung (2018) to ensure similar land properties represented by our ground sampling.

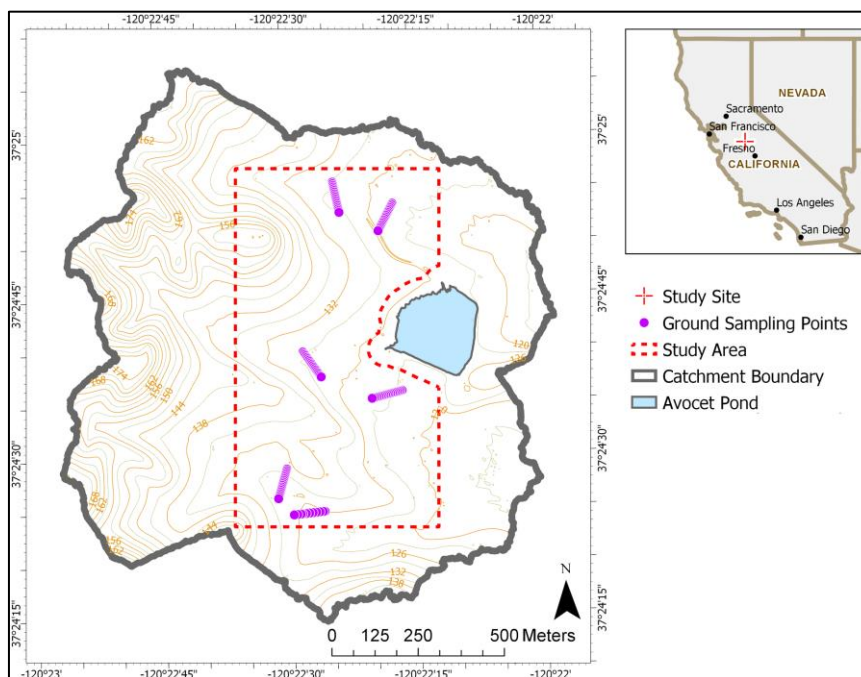

**Figure 2** Map of Avocet Pond catchment showing the footprint of the study area, ground sampling points, and elevation contours in meters. Inset shows the location of the study site (red crosshair) in California.

205 The study area soils are dominated by Redding gravelly loam (Fine, mixed, active, thermic Abruptic Durixeralfs) soils. The elevation of the study area ranges from 118 to 162 m above sea level, and slope ranges from 0 to 31°. The distribution of four topographic variables—elevation, slope, flow accumulation area, and topographic position index—within the study site is given in Figure S1.

210 The fact that vernal pool ecology is predominantly controlled by large seasonal shifts and high spatial variability in hydrology make the study site particularly attractive to the proposed research. UAS have the potential to provide information at appropriate spatial and temporal scales for vernal pool studies (Stark et al., 2015). Knowing soil moisture dynamics at a higher frequency is important, especially during the seasonal transition times. The annual seasonal cycle of the study site is shown in Figure 3.





| Oct               | Nov | Dec | Jan | Feb | Mar | Apr               | May | Jun | Jul | Aug | Sep |
|-------------------|-----|-----|-----|-----|-----|-------------------|-----|-----|-----|-----|-----|
| Transition to wet |     | Wet |     |     |     | Transition to dry |     | Dry |     |     |     |

215 **Figure 3 Vernal pool annual moisture cycle.**

### 3.2 Data Collection

The imagery was acquired on six days during the 2018 per year green-up and brown-down using a fixed-wing UAS with a multispectral camera onboard (See Table 3). Figure 4 shows a typical scene of the study site during wet and dry seasons. Point soil moisture measurements (top 4 cm) were collected with a time-domain reflectometry (TDR) probe across precise sampling transects identified with real-time kinematic (RTK) positioning survey. Daily rainfall and PET values were acquired from nearby weather stations.

220

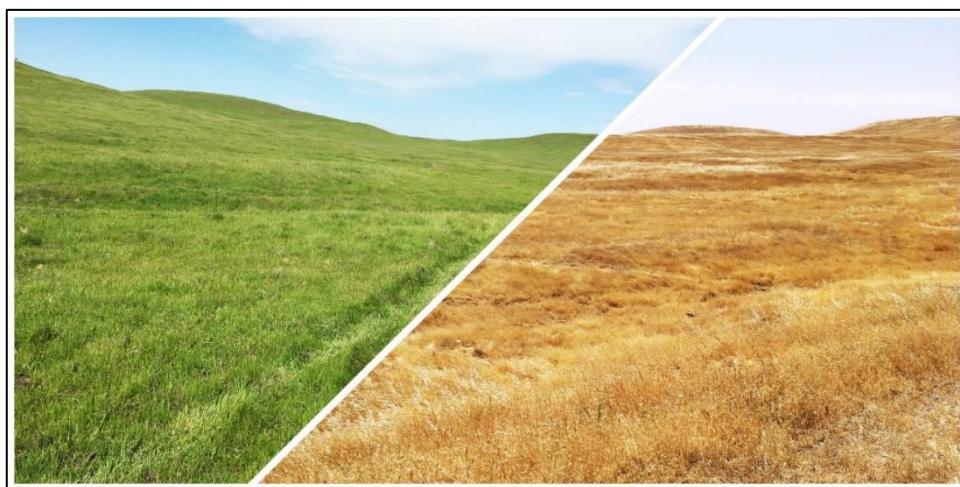

225 **Figure 4 Typical scene of the study area in April (left) and June(right) of 2018.**

#### 3.2.1 Image acquisition and processing

The UAS remote sensing flights were conducted in the late mornings to mid-day during clear weather conditions. A single remote sensing campaign takes approximately three to four hours, meaning images were acquired between approximately 10:00 AM and 2:00 PM

230

Multispectral images were acquired using *Parrot Sequoia* Sensor (Parrot SA, Paris, France) equipped with a sunshine sensor that measured irradiance at the sensor spectral wavebands for radiometric normalization. The camera is deployed on a fixed-wing unmanned aircraft (Finwing Sabre, Finwing Technology) with an average flight height of 120 m above ground level.



Images of a calibrated reflectance panel (MicaSense, Inc, Seattle, WA) were taken before each flight and used in the radiometric calibration of images.

235 The Parrot Sequoia sensor captures four separable bands in the green, red, red edge, and near-infrared bands with a focal length of 3.98 mm and resolution of 1280x960 pixels. A fifth channel captures a high-resolution image in the visible spectrum with a focal length of 4.88 mm and a resolution of 4608x3456 (Pix4D, n.d.). About 12,000 images are captured per flight with a ground pixel resolution of approximately 10 to 15 cm. Images are mosaicked, orthorectified, and radiometrically calibrated using Pix4D photogrammetry software (Pix4D, Lausanne, Switzerland). The Pix4D software also generates DEM  
240 photogrammetrically from stereo-images.

### 3.2.2 In situ soil moisture measurement

The moisture content of the top 4 cm soil was measured simultaneously with UAS remote sensing flights using FieldScout TDR-300 soil moisture meter equipped with a 3.8 cm probe (Spectrum Technologies Inc., IL, USA). The FieldScout TDR-300 measures volumetric water content using time-domain reflectometry with a resolution of 0.1% and an accuracy of  $\pm 3\%$   
245 (Spectrum Technologies Inc., 2009).

We identified six, 90 m long transects within the watershed as sampling transects. To ensure that the sampling transects run over a variety of topography and do not fall within a topographically homogenous area, we generated hydraulic terrain variables using the DEM prior to the selection of transect locations. We generated sub-basin boundaries, flow accumulation, topographic wetness index, and stream network maps. We laid out the sampling transects in a way that they traversed across multiple values  
250 in terms of topographic wetness index and flow accumulation and ensuring that they cross, and not follow, a stream network.

We placed the six transect so that each fell in a separate sub-basin within the Avocet basin. Three of the transects fall in separate sub-basins that feed into the Avocet pond, and the remaining three are in sub-basins below the Avocet pond.

Once we decided on the location of the sampling transects the location of the two ends was recorded accurately using RTK positioning survey and marked with a metal peg hammered into the ground to allow for repeated measurement at the same  
255 location. During the soil moisture measurement campaign, we temporarily affixed a 90 m tape measure at the two ends of the transect and took soil moisture measurement about every 10 m noting the exact distance of the sampling point from the transect ends.

### 3.2.3 Meteorological variables

Daily precipitation data was retrieved from the UC Merced weather station located approximately six km southwest of the study site (California Department of Water Resources, 2018). Daily reference evapotranspiration data was retrieved from the  
260 California Irrigation Management Information System's Merced station located approximately 10 km south of the study site



(California Irrigation Management Information System, 2018). The Reference evapotranspiration is evapotranspiration from standardized grass calculated using the modified Penman (CIMIS Penman) and the Penman-Monteith equations (California Irrigation Management Information System, n.d.). The reference evapotranspiration is considered as PET in this study.

### 265 **3.3 Data Processing**

To prepare the data for machine learning. We compiled all the information into a table with the measured soil moisture from each sampling point and date organized into one column. Each row contained the accompanying information for that sampling point and time.

#### **3.3.1 Multispectral image pre-processing**

##### 270 *3.3.1.1 Geometric Correction*

Pix4D software was used to process the images. Between 7 to 9 ground control point targets (GCPs) with precise locations identified by RTK survey were used for photo alignment. The mean georeferencing root-mean-square-errors (RMSE) of the GCPs ranged from 0.6 – 2 cm, and mean reprojection errors ranged from 0.1 – 0.2 pixel based on the bundle block adjustment error assessment report. DEM was generated using the structure-from-motion technique; noise filtering and mild surface smoothing (sharp smoothing) were applied to correct for noisy and erroneous points of the point cloud. The inverse distance weighting algorithm was used to interpolate between points to create the raster DEM.

##### *3.3.1.2 Radiometric correction*

Along with capturing images in the four spectral bands, the multispectral camera records the location, orientation, and solar irradiation using its GPS, inertial measurement unit (IMU), and sunshine sensor, respectively. Radiometric calibration by the Pix4D software considers the positional data, solar irradiance measurements, and gain and exposure data from the camera to convert raw digital numbers into sensor reflectance values. Sensor reflectance represents the ratio of the reflected light to the incoming solar radiation and provides a standardized measure that is directly comparable between images. Finally, surface reflectance is calculated in post-processing, taking into account the camera's orientation, the angle of the sun, and the known reflectance values of the calibration panel.

### 285 **3.3.2 Feature engineering**

We calculated several variables based on the multispectral reflectance, terrain, and meteorological data to be used to train a machine learning model as predictor variables. A list of all the measured and calculated variables used in modeling soil moisture are given in Table 1.

#### *3.3.2.1 Reflectance based vegetation index*

290 We calculated the Thiam's Transformed vegetation index (TTVI) based on the red and near-infrared bands (Equation 1).



$$TTVI = \sqrt{\left| \frac{NIR - R}{NIR + R} + 0.5 \right|} \quad (1)$$

The TTVI is a transformation of the commonly used Normalized Difference vegetation index (NDVI). The reason for choosing of TTVI over NDVI is that it eliminates negative values and transforms NDVI histograms into a normal distribution.

### 3.3.2.2 Terrain variables

295 A list of the calculated topographic variables and their description is given in Table 1. Topographic variables derived from DEM are scale-dependent, to account for this, we calculated all topographic variables on six different resolution DEM. For this, we first upscaled the DEM from the original resolution of 6.85 cm to 15, 30, 60, 100, 300, and 500 cm cell resolution. We then calculated topographic variables on all the resolutions.

300 The calculation of topographic position index (TPI) does not only depend on DEM resolution but on the definition of inner and out radii of the annulus (see Equation 2).

$$TPI = Elevation - focal\ mean(annulus(Inner\ Radius, Outer\ Radius)) \quad (2)$$

We calculated TPI for different neighborhood sizes using the ArcGIS 10.5 Land Facet Corridor Tool (Jenness et al., 2013). We calculated TPI on three DEM resolutions (100, 300, and 500 cm) with two inner radii (1 and 3 cells) and three outer radii (3, 5, and 7 cells). The raster images of selected topographic variables are shown in Figure S2.

305

### 3.3.2.3 Meteorological variables

Precipitation and PET are two important drivers of surface soil moisture. We used the cumulative water year precipitation and PET. We also calculated rolling sums of those variables with different time windows before the measurement, we calculated 1-, 2-, 3-, 7-, 15, and 30-day cumulative precipitation and PET before sampling dates and used those rolling sums as input.

310



**Table 1 Measured and calculated data used for machine learning. All topographic variables are computed from the digital elevation model. Descriptions and significance of topographic variables adapted from Wilson & Gallant (2000).**

|            | Variable [unit]                                             | Description                                                                                                                                                                                                        | Significance/ relation to soil moisture                                                                     |
|------------|-------------------------------------------------------------|--------------------------------------------------------------------------------------------------------------------------------------------------------------------------------------------------------------------|-------------------------------------------------------------------------------------------------------------|
| Measured   | Soil moisture content [%]                                   | Volumetric soil moisture content                                                                                                                                                                                   | Variable of interest.                                                                                       |
|            | Daily rainfall [mm]                                         | Daily rainfall from Precipitation Gage (OTT Pluvio) with a windshield                                                                                                                                              | Source of soil moisture                                                                                     |
|            | Green [-]                                                   | Surface reflectance in the green wavelength band (530 – 570 nm)                                                                                                                                                    | Soil and vegetation reflectance change                                                                      |
|            | Red [-]                                                     | Surface reflectance in the red wavelength band (640 – 680 nm)                                                                                                                                                      | Soil and vegetation reflectance change                                                                      |
|            | Red-edge [-]                                                | Surface reflectance in the red-edge wavelength band (730 – 740 nm)                                                                                                                                                 | Soil and vegetation reflectance change                                                                      |
|            | Near-infrared [-]                                           | Surface reflectance in the near-infrared wavelength band (770 – 810 nm)                                                                                                                                            | Soil and vegetation reflectance change                                                                      |
|            | Altitude [m]                                                | Elevation (m)                                                                                                                                                                                                      | Vegetation, potential energy                                                                                |
| Calculated | Daily potential evapotranspiration [mm]                     | Reference evapotranspiration from standardized grass calculated using CIMIS Penman equation.                                                                                                                       | Major soil moisture loss pathway.                                                                           |
|            | Thiam's Transformed Vegetation Index (TTVI) [-]             | $TTVI = \sqrt{\left  \frac{NIR - R}{NIR + R} + 0.5 \right }$                                                                                                                                                       | Vegetation moisture stress.                                                                                 |
|            | Slope [degrees]                                             | Slope gradient (degrees)                                                                                                                                                                                           | Surface and subsurface flow velocity, runoff rate, vegetation, geomorphology                                |
|            | Aspect [ $\cos(\text{degrees})$ ]                           | Cosine transformed direction of maximum downward gradient (northernness).                                                                                                                                          | North and south-facing slopes differ in solar insolation, PET, flora and fauna distribution, and abundance. |
|            | Profile curvature [-]                                       | Downslope curvature                                                                                                                                                                                                | Flow acceleration, erosion/deposition rate, geomorphology                                                   |
|            | Plan curvature[-]                                           | Along-side curvature                                                                                                                                                                                               | Converging/diverging flow, soil characteristics                                                             |
|            | Tangential curvature[-]                                     | Curvature in an inclined plane                                                                                                                                                                                     | Represents areas of convergent (concave) and divergent (convex) flow.                                       |
|            | Flow accumulation (MFD methods) (A) [cm <sup>2</sup> ]      | Catchment area draining to pixel                                                                                                                                                                                   | Runoff volume, geomorphology                                                                                |
|            | Length-Slope factor, LS [-]                                 | Length-slope factor from the Revised Universal Soil Loss Equation (RUSLE). For slope lengths <100 m and slopes <14°:<br>$LS = 1.4 \left( \frac{A}{22.12} \right)^{0.4} \left( \sin \frac{S}{0.0896} \right)^{1.3}$ | Calculates a spatially distributed sediment transport capacity                                              |
|            | Topographic position index, based SFD and MFD methods [-]   | $TPI = Z_0 - \frac{1}{n_R} \sum_{i \in R} Z_i.$                                                                                                                                                                    |                                                                                                             |
|            | Topographic wetness index, based on SFD and MFD methods [-] | $TWI = \ln \left( \frac{A}{\tan S} \right)$                                                                                                                                                                        | Commonly used index to quantify topographic control on hydrological process.                                |



### 3.3.3 Data aggregation

We had a total of 406 soil moisture measurements across the six different measurement times. For each soil moisture, we extracted the raster values of reflectance and terrain variable by using raster to point data extraction tool in ArcGIS Pro using a 100 cm radius means. For this, ground coordinates of sampling locations were overlaid onto the geo-referenced image, and the pixel values across the bands representing the center of each sampled area were extracted **to result** in tabular data. We also included the **meteorological** variables for each soil moisture reading.

#### 3.3.3.1 Variable transformation

Prior to model training, all the predictor variables were standardized by centering the training variable's mean to zero and scaling by the variable's standard deviation, as shown in Equation (3):

$$x' = \frac{x - \bar{x}}{\sigma_x} \quad (3)$$

where  $x'$  is the centered and scaled value of variable  $x$  and;  $\bar{x}$  and  $\sigma_x$  are the arithmetic mean and standard deviation of the variable.

#### 3.3.3.2 Variable selection

Variable selection (or feature selections) involves the selection of a subset of relevant variables (features) from a larger set of potential predictors. The benefits of variable selection include improvement of model performance, reducing training and utilization times, and facilitating data understanding (Guyon and Elisseeff, 2003; Weston et al., 2003). We employed three methods of variable selection: tests of linear correlation and linear dependencies among variables, and recursive feature elimination. Recursive feature elimination involves removing the least important features whose omission has the least effect on training errors (Chen and Jeong, 2007; Guyon et al., 2002). We implemented recursive feature elimination procedure during the coarse tuning of BRT, RF, ANN, and SVR algorithm models.

The data preparation resulted in 138 variables. Of these, 76 variables were removed based on linear correlation and linear dependencies among variables. An additional 16 were removed following the recursive feature elimination procedure. The final data used for building the models had 46 variables (Table 2), of which five are **meteoric**, nine are reflectance variables, and 32 are topographic variables. **Variable categories that had no importance included the topographic wetness index (TWI), the reflectance in the red-edge band, and NDVI.**



**Table 2 Important predictor variables used in final models.**

| Domain      | Variable                     | Scale*                                                 |
|-------------|------------------------------|--------------------------------------------------------|
| Meteoric    | Potential evapotranspiration | 1, 30                                                  |
|             | Precipitation                | 1, 15, 30                                              |
| Reflectance | Green                        | 0.6, 1, 3                                              |
|             | Red                          | 0.6, 1, 3                                              |
|             | Near Infrared                | 0.6, 1, 3                                              |
| Topographic | Northernness                 | 0.6, 1, 3, 5                                           |
|             | Slope                        | 0.6, 1, 3, 5                                           |
|             | Flow Direction               | 0.6, 1, 3, 5                                           |
|             | Flow Accumulation            | 0.6, 1, 3, 5                                           |
|             | Curvature (Profile)          | 1, 3, 5, 50                                            |
|             | Curvature (Planform)         | 0.6, 1, 3, 5, 50                                       |
|             | Topographic Position Index   | (1,3), (3,7), (3,9), (5,15), (9,21), (15,35), (15,100) |

\* Scale for raster products is pixel resolution in meters, and cumulative days for the **meteoric** variables. Topographic Position Index scale is a combination of the **inner-outer diameters in meters**

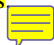

345

### 3.4 Data Description

The data collection days and summary site statistics are given in Table 3. Measurements were done on six different days spread throughout the 2018 water year. The cumulative precipitation and PET for the 2018 water year are shown in Figure S3 and 1 to 30-day rolling sums of precipitation and PET for the sampling dates are shown in Figure S4.

350

**Table 3 Data collection days and site summary statistics.**

|   | Date       | Day of the water year | Cumulative water-year precipitation [mm] | Cumulative water-year PET [mm] | Mean soil moisture (and standard deviation) [%] | Sample count |
|---|------------|-----------------------|------------------------------------------|--------------------------------|-------------------------------------------------|--------------|
| 1 | 2017-10-30 | 30                    | 5.8                                      | 96.58                          | 2.47 (1.09)                                     | 60           |
| 2 | 2017-12-04 | 65                    | 34.3                                     | 149.16                         | 12.26 (5.23)                                    | 60           |
| 3 | 2018-01-23 | 115                   | 85.6                                     | 199.15                         | 24.85 (7.79)                                    | 64           |
| 4 | 2018-04-04 | 186                   | 133.3                                    | 371.81                         | 20.27 (10.72)                                   | 92           |
| 5 | 2018-05-01 | 213                   | 177.9                                    | 489.18                         | 8.98 (3.93)                                     | 74           |
| 6 | 2018-05-24 | 236                   | 177.9                                    | 619.26                         | 4.42 (1.68)                                     | 56           |



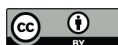

355

The soil moisture measurement followed the general precipitation patterns but was also influenced by immediate rainfall events; the highest soil moisture occurred on the only measurement day where it had rained the day before (January 23, 2018). The vegetation greenness, as measured with TTVI followed the 15-day cumulative rainfall well with maximum greenness occurring on April 4, 2018, and sharply decreasing the following two months (Figure 5).

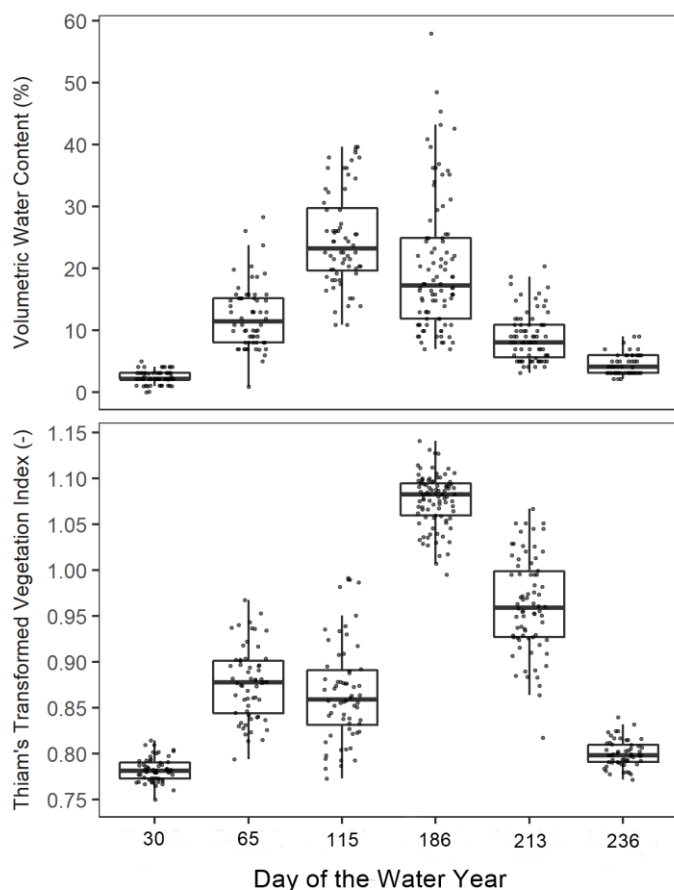

**Figure 5** Measured soil moisture and vegetation index of the ground sampling locations from 1 m resolution raster.

360

Figure S5 shows the distribution of some terrain variables of the ground sampling points derived from the digital elevation model and correlations between variables. The terrain variables for the ground sampling points show a reasonable distribution in values, while the distribution of elevation shows a bimodal distribution with ranges from 120 to 130 m, most of the other variables show a close to normal distribution. The only variables with Person's correlation above 0.5 are between TPI and curvature (Pearson's correlation = 0.67). The distribution of values for the variables selected variables in the data is shown in Figure S6.

365



### 3.5 Machine Learning Procedure

The overall machine learning procedure is illustrated in Figure 1. The computationally demanding steps of model training and testing were run at the Multi-Environment Research Computer for Exploration and Discovery (MERCED) high-performance computing cluster, at the University of California, Merced. The *caret* R package (Kuhn, 2017) was used to handle training and tuning procedures. The SVR and RVR algorithms were implemented using the *kermlab* package (Karatzoglou et al., 2004), RF algorithm was implemented using the *randomForest* package (Liaw and Wiener, 2015), and the BRT algorithm using the *xgboost* package (Chen and Guestrin, 2016).

#### 3.5.1 Training-testing set splits

The data was split into training and testing sets of approximately 75-25 percent, respectively (i.e., 300 and 100 records). The testing set was a hold-out set used only to evaluate final trained models.

For the testing set, two transects are randomly selected on four randomly selected sampling dates, and one transect is randomly selected on the remaining two sampling dates. To minimize bias that may result from the training-testing set split, we generated 30 unique training-testing set splits and trained 30 separate models based on each separate training set. The performance of each model was assessed on its respective testing set. Similar performance of the individual models would indicate that bias due to the training-testing set split is minimal. The justification for this subsetting procedure is: (1) the selection of entire transects as testing sets avoids the possible data leakage between the training and testing sets due to spatial autocorrelation since samples in a transect are located close to each other—a simple random splitting would not avoid this potential problem; (2) all six sampling dates are represented in the training set—models are trained on the entire range of time and soil moisture changes; and (3) the testing set is between 25 to 30 percent of the data (between 100 to 125 samples).

The distribution of samples across the sampling dates and transects for the training and testing sets are shown in, Figures S7 and S8, respectively.

On average the training-testing split was 294 samples in the training sets and 113 samples in the testing sets. All the training sets have samples from all the six sampling dates and transects. While all sampling dates are represented in each testing set, on average, there are five transects in each testing set.

#### 3.5.2 Cross-validation procedure

The selection of optimal model parameters in the model training process was done by the cross-validation method. Cross-validation is done to estimate the test error rate by holding out a subset of the training data (i.e., validation set) from the fitting process and then applying the fitted model to predict the validation subset. A 30-fold cross-validation set was generated by



395 randomly splitting the training data into 80-20 percent training-validation split by randomly selecting a single transect every day. Optimum model parameters were selected using a comprehensive grid search method.

### 3.5.3 Model assessment

#### 3.5.3.1 Performance

The final performance of models was assessed on the separate hold-out test dataset that was not used in the model training.  
400 The performance of models is measured in terms of mean absolute error (MAE), mean bias error (MBE) and the coefficient of determination ( $R^2$ ) determined as follows:

$$MAE = \frac{1}{N} \sum_{i=1}^N |y_i - \hat{y}_i| \quad (4)$$

$$MBE = \frac{1}{N} \sum_{i=1}^N (\hat{y}_i - y_i) \quad (5)$$

$$R^2 = 1 - \frac{\sum_{i=1}^N (y_i - \hat{y}_i)^2}{\sum_{i=1}^N (y_i - \bar{y})^2} \quad (6)$$

405 Where  $N$  is the number of observations;  $y$  is the measured value;  $\hat{y}$  is the predicted value; and  $\bar{y}$  is the mean of measured values.

The MAE indicates the average deviation of predictions from the measured value with smaller values indicating better performance. The MBE measures the average systematic bias, positive or negative values indicate the average tendency of the predicted values to be larger or smaller than the measured values, respectively. The  $R^2$  measures the correspondence between  
410 predicted and measured data with higher values indicating stronger correspondence. The MAE was chosen over RMSE as it is a more appropriate measure when averaging (Willmott and Matsuura, 2005).

#### 3.5.3.2 Variable importance

The predictor variable importance is the statistical significance of each predictor variable with respect to its effect on the generated model. For the tree-based models, RF and BRT, variable importance is calculated internally within the model  
415 algorithm (Equation 1). For the rest of the machine learning models, we calculated the predictor variable importance by recursive feature elimination method, which is done by recursively removing predictors before training a model and evaluating the change in model performance. In this method, to account for possible bias in variable subset selection (Ambrose and



McLachlan, 2002; Hastie et al., 2009), we included a separate layer of 10-fold cross-validation to the entire sequence modeling steps.

#### 420 3.5.3.3 Effect of predictor variables

The relationship between the predictor variables and outputs for a black-box model can be analyzed using model-independent methods such as partial dependence plots or accumulated local effects (ALE) plots (Apley, 2016; Greenwell, 2017). These plots help explain the relationship between the outcome of black-box supervised machine learning models and predictors of interest. We use the ALE plots to analyze the effect of selected predictor variables. Although similar, the ALE plots are preferred over partial dependence plots for their speed and their ability to produce unbiased plots when variables are correlated (Apley, 2016). The value of the ALE is centered so that the mean effect is zero; it can be interpreted as the effect of the variable on the outcome at a certain value compared to the average prediction of the data. For example, an ALE estimate of -2 when a variable of interest has value 3, then the prediction is lower by 2 compared to the average prediction (Molnar, 2019).

### 3.6 Software Used

430 Preliminary UAS image processing—radiometric calibrations and, orthomosaic and DEM generation—is done using Pix4D photogrammetry software (Pix4D, Lausanne, Switzerland). Raster rescaling, terrain analysis, and spatial data visualization are done in ArcGIS Pro software (ESRI, Redlands, CA, USA). The machine learning process—data preparation, model tuning, and prediction—were done in R (R Core Team, 2019).

## 4 Results

### 435 4.1 Model Performance

Performances of the five machine learning algorithms we tested are presented in Figure 6. The BRT and RF algorithms had the best performance with MAE of less than 4 % volumetric water content. The relatively high accuracy of BRT and RF models is consistent with other studies that find ensemble decision-tree-based regression models perform better than many other machine learning algorithms (Caruana and Niculescu-Mizil, 2006); particularly in terrain and soil spatial predictions (Hengl et al., 2017, 2018; Keskin et al., 2019; Nussbaum et al., 2018; Szabó et al., 2019). The RF model is much easier and faster to train compared to the other machine learning algorithms used. Since the ensemble trees are independent in RF model, the ‘forest’ can be grown simultaneously, which dramatically increases processing efficiency in parallel computing. In addition, the RF model has few hyperparameters to tune. In contrast, the ensemble trees in the BRT algorithm must be grown sequentially since each new tree is dependent on the previous ensemble (which makes parallel processing challenging). Training a BRT model requires tuning multiple hyperparameters—seven in our implementation of the BRT model.

The individual performances of the 30 tuned BRT models on their respective testing sets are shown in Figure 7. On average the ensemble of the BRT models had MAE of 3.77 % across all 30 testing sets. Given that the locations of ground sampling



450

points were clustered in the six transects, selection of testing and training datasets can lead to spatial bias. To minimize such biases, the transects for the testing dataset were randomly for each sampling day. Comparison of the performance of models across the different training-testing splits suggests that the potential bias based on testing set selection was minimal.

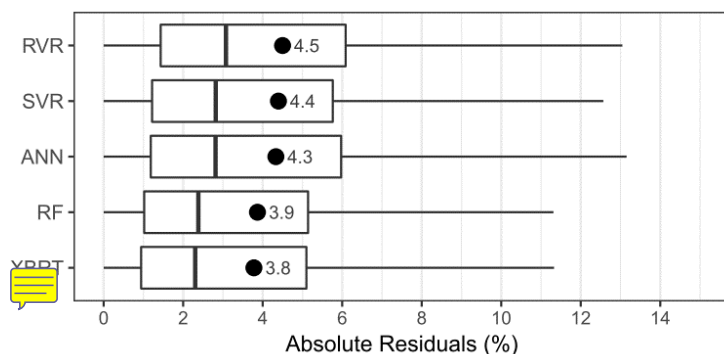

**Figure 6** Distribution of residuals and MAE on the testing set by the type of machine learning algorithm. Filled circles and values to their right indicate the average MAE.

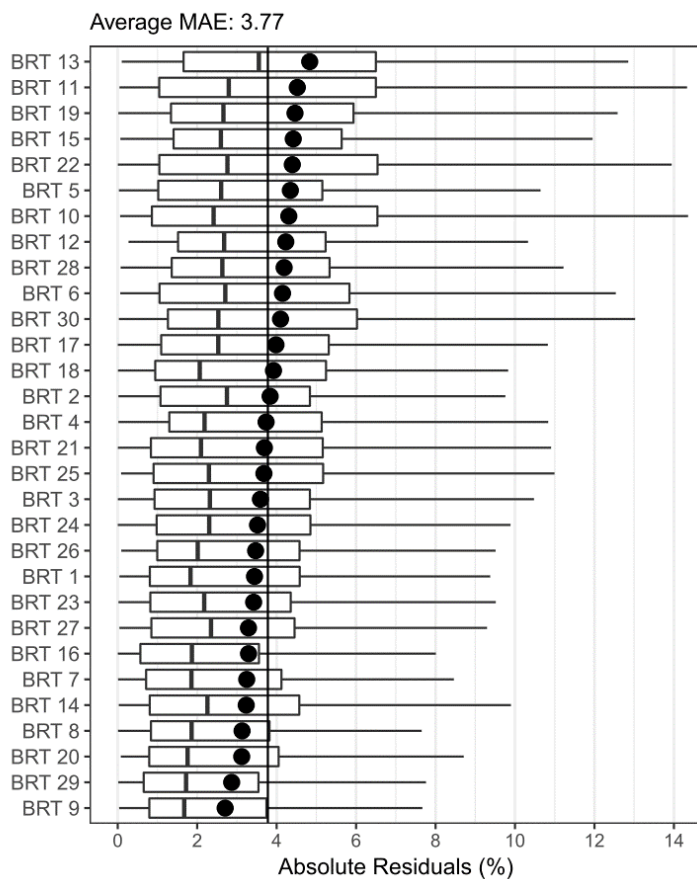

455

**Figure 7** Distribution of residuals and MAE on the testing set for the 30 BRT models. Filled circles indicate MAE and solid vertical line indicates the average MAE overall individual models.

The measured water contents from the testing data sets are compared with the prediction by all the trained models in Figure 8.

460

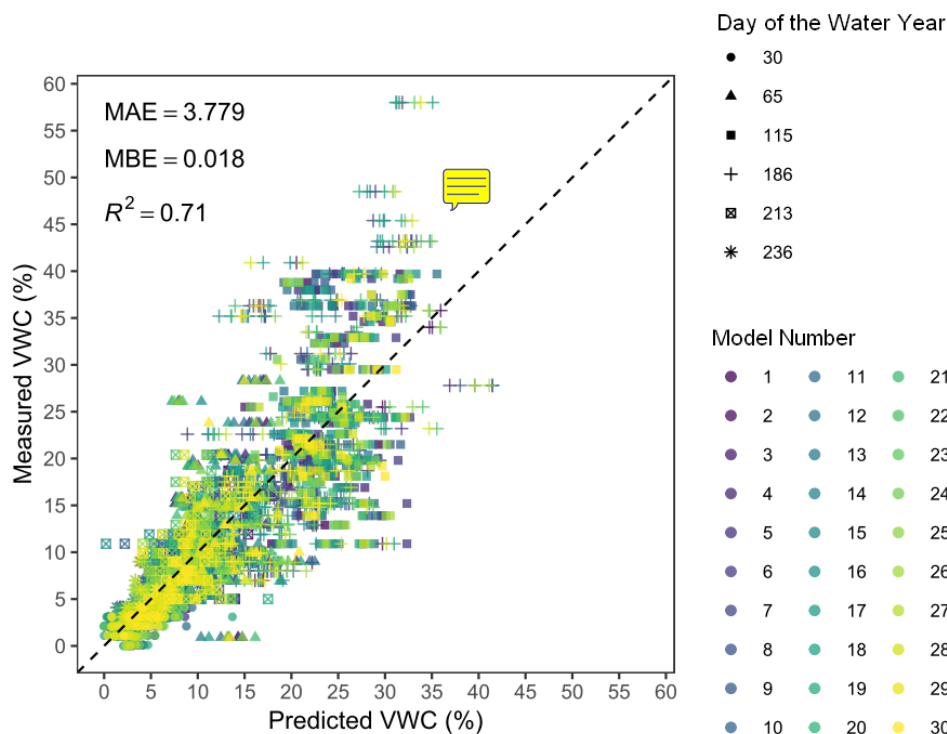

**Figure 8** Scatter of the measured versus predicted soil water content of the testing sets around 1:1 line. MAE, MBE, and R2 are averaged across the 30 models.

465 **4.2 Predictor Variable Importance**

The relative importance of predictors from the BRT model grouped by variable type (lumping variables regardless of variable specifications such as summation window for precipitation or pixel resolution for the raster) are shown in Figure 9. Notice that the only temporally dynamic variables are the meteoric and reflectance variables, the topographic variables are not time-dependent and only need to be generated once for a study area. The top four important variables are precipitation, reflectance in the red band, PET, and TPI (Figure 9). The four most important variables not grouped by type are the 15 and 30-day cumulative precipitation, 30-day cumulative PET, and the red bands. TPI and flow accumulation are the most important of the topographic variables (Figure S9).

470



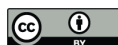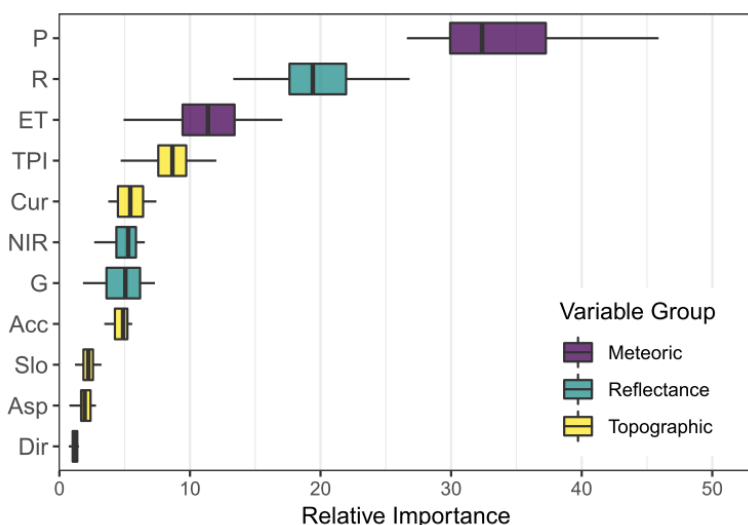

475 **Figure 9** Sum of the relative variable importance distribution of the 30 models grouped by variable type.

### 4.3 Effect of Predictor Variables

We used the ALE plots to investigate the effects of TPI, curvature, and flow accumulation variables on soil moisture estimates (Figure 10). Given the high importance of these topographic variables, we were interested in identifying the nature of each variable's relation with soil moisture and thresholds of large changes. Predicted soil moisture generally increased with flow accumulation. At 1 m resolution DEM, soil moisture initially decreased as surface became less convex and increased as surface curvature transitioned from convex to concave (values -5 to +5). Above the value of about +5, soil moisture decreased with curvature. However, at lower scales (3, 5 and 50 m resolution DEM), soil moisture was maximum at convex to concave transition (near 0) but there was no decrease in moisture at higher concave values and with the lowest resolution (50 m DEM) soil moisture continued to increase with an increase in concavity of surface). TPI is very scale-dependent. However, TPI across all scales had pattern relation with soil moisture. Negative TPI values indicate trends towards valleys, zero values indicate flat areas if the slope is shallow or mid-slope areas for areas with significant slope and positive TPI values indicate trends towards ridgetops (Jenness et al., 2013). Across all scales, there was a negative relationship between TPI and soil moisture at negative values and a positive relationship at positive TPI values; this indicates valleys and ridge tops were wetter than mid-slope areas. The TPI scale that had was the highest variable importance was calculated with an inner diameter of 15 m and an outer diameter of 35 m (TPI (15, 35)). At this scale, the increase in soil moisture moving from mid-slope to valley areas was most pronounced.

Topography has a strong control on soil moisture distribution at landscape scales (Sørensen et al., 2006). While the TPI was the most important topographic variable in determining soil moisture, the TWI was found to be not an important predictor. Although the machine learning models are considered non-spatial models, that is, they do not consider sampling location



495 information and spatial autocorrelations (Georganos et al., 2019; Hengl et al., 2018). The inclusion of spatially dependent variables (specifically: curvature, flow accumulation, and TPI) as predictors, however, means that the models do account for spatial information to an extent and this should make the predictions more spatially relevant.

The red band was the most predictive of the three bands. Reflectance in the red-edge was found to be not an important predictor. The two greenness indices we tested, i.e., NDVI and TTVI, were not important even though their constituent bands, the red and NIR were important. The lower importance of NIR in predicting surface soil moisture was particularly surprising given the sensitivity of NIR band to moisture to plant stress.

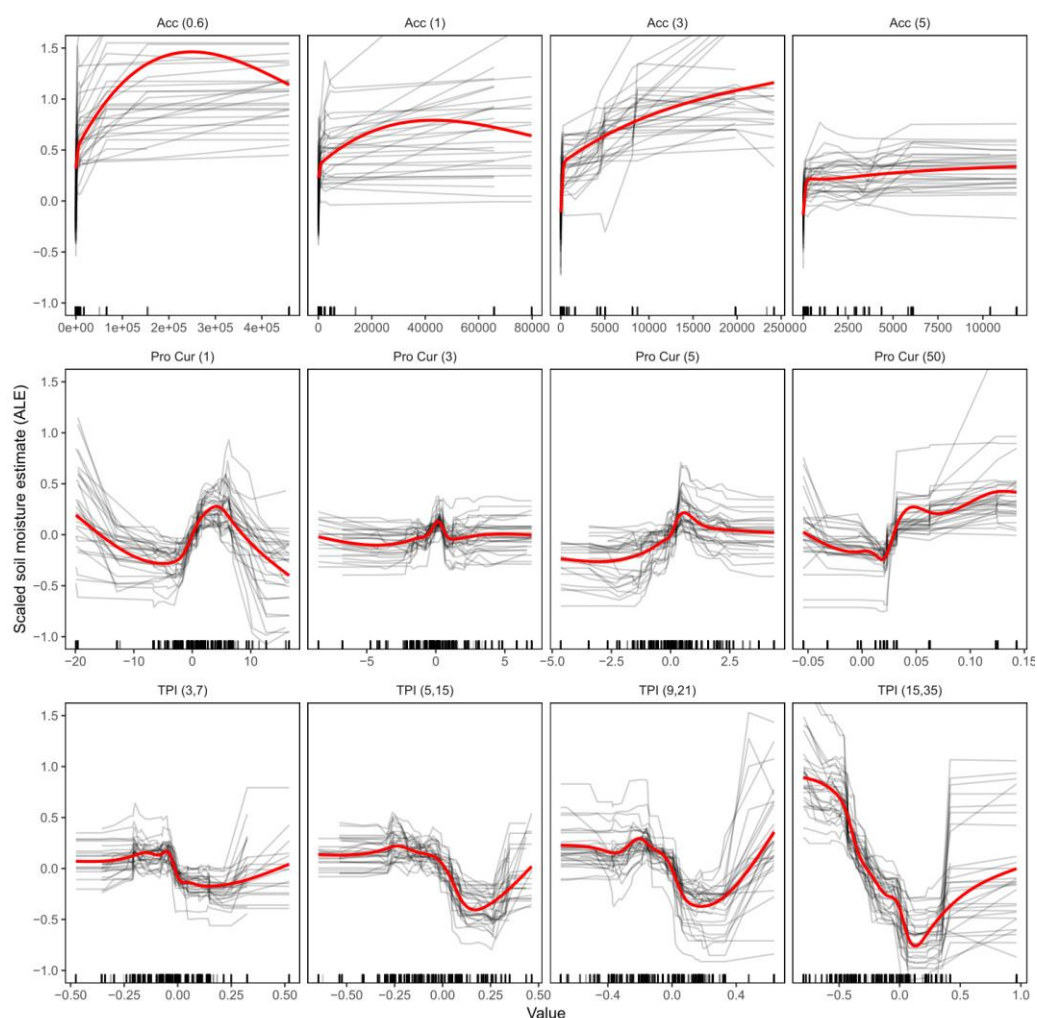

505 **Figure 10** ALE plots for flow accumulation, profile curvature, and TPI variables at four different scales (see Table 2). Black curves represent individual effects of the 30 models, and red curves are smoothed trendlines overall individual models. Marks along the x-axis show the distribution of data in the model training set.



#### 4.4 Spatial Prediction of Soil Moisture

510 Volumetric water content from the best BRT model was used to predict soil moisture for the test area for all six measurement days Figure 11. While the mean moisture content was mostly determined by the day, the distribution shows a visually similar distribution to topography. Ridges appear drier while valleys appear wetter. The distribution of soil moisture predictions over the test area for each day is shown in Figure S10.

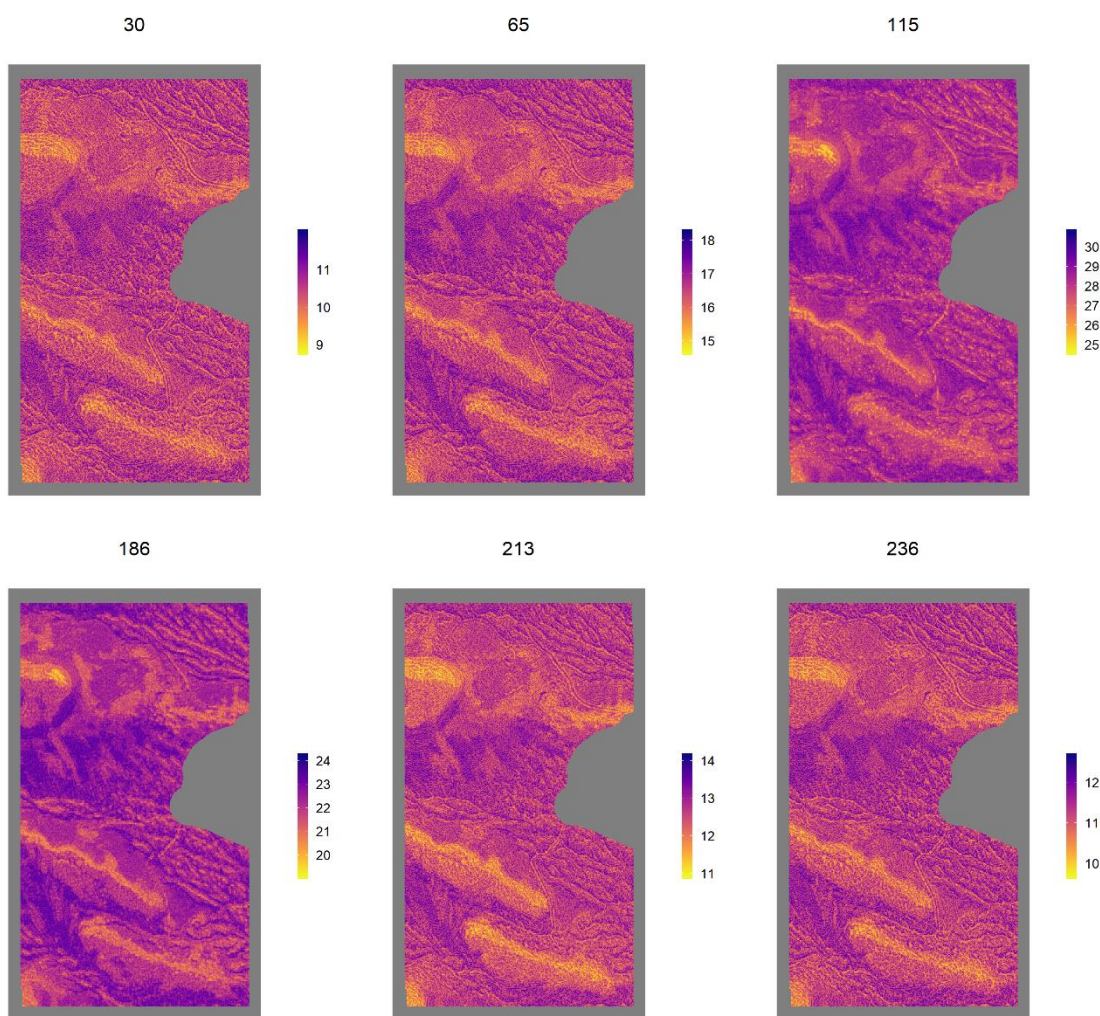

515 **Figure 11** Predicted volumetric water content (%) over the study area for the six days sampled. Days of the water year 30, 65, 115, 186, 213, and 236 are 10/30/2017, 12/4/2017, 1/23/2018, 4/4/2018, 5/1/2018, and 5/24 /2018, respectively).





A close-up map of soil moisture prediction for January 23, 2018, is shown in Figure 12 and shows that soil moisture varies considerably with topography.

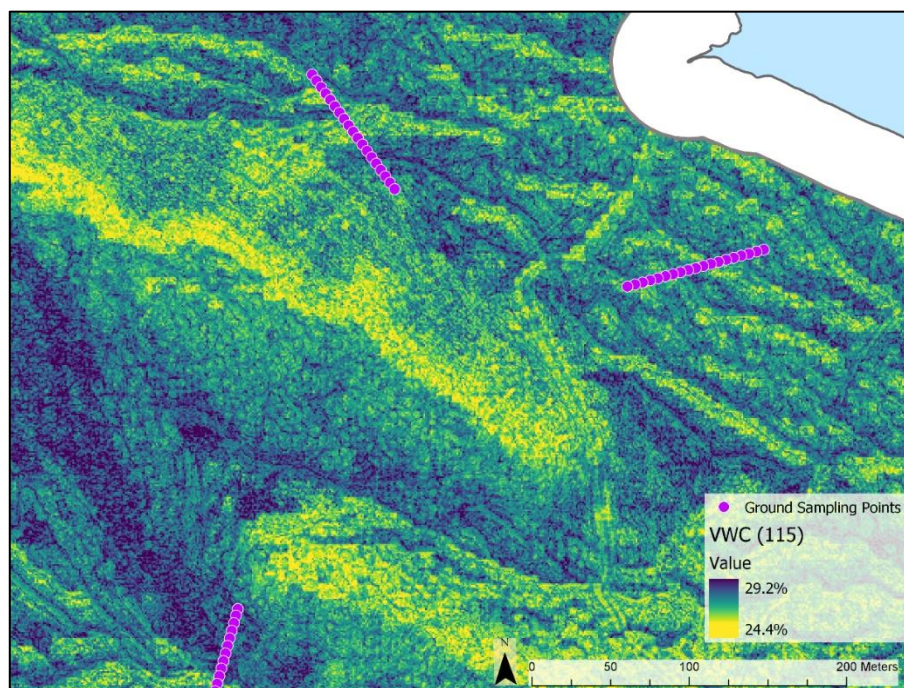

520 **Figure 12 Predicted volumetric soil water content (%) map for the 115<sup>th</sup> day of the water year (January 23, 2018).**

## 5 Conclusion and Outlook

This research serves as a proof of concept that surface soil moisture can be interpreted with reasonable accuracy from multispectral UAS remote sensing using machine learning methods. As a data mining technique, machine learning model performance and reliability are closely tied to the quantity of data. Although the number and spatial coverage of ground sampling points were reasonable, the addition of more sampling points and some occasional measurements at random locations within the study area would have greatly helped to strengthen the reliability of the models. Multi-year studies are eventually needed to ensure that the model can be used for future predictions. The reflectance variables' dependence on the annual cycle of vegetation versus meteoric variables would be better resolved with multi-year studies. Although more challenging to implement, studies of deeper soil root-zone soil moisture are more ecologically relevant in semi-arid grasslands such as our study site and should be considered. Expanding the reflectance information beyond multispectral bands could lead to important improvements in soil moisture prediction. Although lightweight thermal or hyperspectral sensors are currently very expensive

and may not be financially feasible for routine applications at this time, those technologies might become more affordable in the future.

535 The possibility of using the high-resolution topographic variables from UAS with reflectance data from satellite remote sensing is an interesting topic to study. This would mean the UAS would only be flown once in an area and future and past predictions of soil moisture can be estimated using satellite images and meteoric data from stations. This would also be ideal to downscale satellite data by integrating high-resolution topographic information from UAS remote sensing. Although the machine learning models are high performing and generalizable models, they are non-spatial models that do not consider sampling location  
540 information and spatial autocorrelations. This can potentially compromise the model's ability to appropriately address spatial heterogeneity (Georganos et al., 2019; Hengl et al., 2018). Hengl et al. (2018) introduce a novel method to incorporate spatial information into a non-spatial machine learning model by including distances between sampling points as predictor variables, and they show this method (although still in its formative stage) has comparable accuracy to kriging methods. The potential to improve soil moisture predictions by using such spatially integrated methods should be considered in future research.

545

### Acknowledgments

This work was made possible by the support of U.S. Fish and Wildlife Service Agreement #P1740401 as administered by the California Department of Fish and Wildlife; Monique Kolster and the UC Merced Vernal Pools and Grassland Reserve of the Natural Reserve System; and Francesca Cannizzo of the UC Merced Physical and Environmental Planning team. We gratefully  
550 acknowledge computing time on the Multi-Environment Computer for Exploration and Discovery (MERCED) cluster at UC Merced, which was funded by National Science Foundation Grant No. ACI-1429783.



## References

- 555 Ahmad, S., Kalra, A. and Stephen, H.: Estimating soil moisture using remote sensing data: A machine learning approach, *Adv. Water Resour.*, 33(1), 69–80, doi:10.1016/j.advwatres.2009.10.008, 2010.
- Ali, I., Greifeneder, F., Stamenkovic, J., Neumann, M. and Notarnicola, C.: Review of Machine Learning Approaches for Biomass and Soil Moisture Retrievals from Remote Sensing Data, *Remote Sens.*, 7(12), 16398–16421, doi:10.3390/rs71215841, 2015.
- 560 Ambroise, C. and McLachlan, G. J.: Selection bias in gene extraction on the basis of microarray gene-expression data, *Proc. Natl. Acad. Sci.*, 99(10), 6562–6566, doi:10.1073/pnas.102102699, 2002.
- Anderson, K. and Gaston, K. J.: Lightweight unmanned aerial vehicles will revolutionize spatial ecology, *Front. Ecol. Environ.*, 11(3), 138–146, doi:10.1890/120150, 2013.
- 565 Apley, D. W.: Visualizing the Effects of Predictor Variables in Black Box Supervised Learning Models. [online] Available from: <https://arxiv.org/ftp/arxiv/papers/1612/1612.08468.pdf> (Accessed 13 June 2019), 2016.
- Barrett, B. W. and Petropoulos, G. P.: Satellite Remote Sensing of Surface Soil Moisture, in *Remote Sensing of Energy Fluxes and Soil Moisture Content*, edited by G. P. Petropoulos, pp. 85–120, CRC Press., 2014.
- Ben-Dor, E., Chabrillat, S., Demattê, J. A. M., Taylor, G. R., Hill, J., Whiting, M. L. and Sommer, S.: Using Imaging Spectroscopy to study soil properties, *Remote Sens. Environ.*, 113(SUPPL. 1), S38–S55, doi:10.1016/j.rse.2008.09.019, 2009.
- 570 Ben-Shimon, D. and Shmilovici, A.: Kernels for the Relevance Vector Machine - An Empirical Study, in *Advances in Web Intelligence and Data Mining*, edited by M. Last, P. S. Szczepaniak, Z. Volkovich, and A. Kandel, pp. 253–263, Springer-Verlag GmbH., 2006.
- 575 Berni, J. A. J., Zarco-Tejada, P. J., Suárez, L., González-Dugo, V. and Fereres, E.: Remote sensing of vegetation from UAV platforms using lightweight multispectral and thermal imaging sensors, *Int. Arch. Photogramm. Remote Sens. Spat. Inform. Sci.*, 38, 6 pp, doi:10.1007/s11032-006-9022-5, 2009.
- Breiman, L.: Random Forest, *Mach. Learn.*, 45(1), 5–32, doi:10.1023/A:1010933404324, 2001.
- California Department of Water Resources: UC Merced Weather Station, [online] Available from: [http://cdec.water.ca.gov/dynamicapp/staMeta?station\\_id=UCM](http://cdec.water.ca.gov/dynamicapp/staMeta?station_id=UCM) (Accessed 1 February 2019), 2018.
- 580 California Irrigation Management Information System: CIMIS Station Report, [online] Available from: <https://cimis.water.ca.gov/WSNReportCriteria.aspx> (Accessed 1 February 2019), 2018.
- California Irrigation Management Information System: Data Overview, [online] Available from: <https://cimis.water.ca.gov/Resources.aspx> (Accessed 19 April 2019), n.d.
- 585 Caruana, R. and Niculescu-Mizil, A.: An empirical comparison of supervised learning algorithms, in *Proceedings of the 23rd international conference on Machine learning - ICML '06*, pp. 161–168, ACM Press, New York, New York, USA., 2006.
- Chen, T. and Guestrin, C.: XGBoost: A Scalable Tree Boosting System, in *Proceedings of the 22nd ACM SIGKDD International Conference on Knowledge Discovery and Data Mining - KDD '16*, pp. 785–794, ACM Press, New York, New York, USA., 2016.



- 590 Chen, X. and Jeong, J. C.: Enhanced Recursive Feature Elimination, Proc. - 6th Int. Conf. Mach. Learn. Appl. ICMLA 2007, 330–335, doi:10.1109/ICMLA.2007.35, 2007.
- Colomina, I. and Molina, P.: Unmanned aerial systems for photogrammetry and remote sensing: A review, ISPRS J. Photogramm. Remote Sens., 92, 79–97, doi:10.1016/j.isprsjprs.2014.02.013, 2014.
- Cortes, C. and Vapnik, V. N.: Support-Vector Networks, Mach. Learn., 20(3), 273–297, doi:10.1023/A:1022627411411, 1995.
- 595 Das, N. N. and Mohanty, B. P.: Root Zone Soil Moisture Assessment Using Remote Sensing and Vadose Zone Modeling, Vadose Zo. J., 5(1), 296, doi:10.2136/vzj2005.0033, 2006.
- Drucker, H., Burges, C. J. C., Kaufman, L., Smola, A. and Vapnik, V. N.: Support vector regression machines, in Advances in Neural Information Processing Systems 9, vol. 1, edited by M. C. Mozer, M. I. Jordan, and T. Petsche, pp. 155–161, MIT Press. [online] Available from: <http://papers.nips.cc/paper/1238-support-vector-regression-machines.pdf>, 1997.
- 600 Elarab, M.: The Application of Unmanned Aerial Vehicle to Precision Agriculture: Chlorophyll, Nitrogen, and Evapotranspiration Estimation, Utah State University., 2016.
- Elith, J., Leathwick, J. R. and Hastie, T.: A working guide to boosted regression trees, J. Anim. Ecol., 77(4), 802–813, doi:10.1111/j.1365-2656.2008.01390.x, 2008.
- 605 Friedman, J. H.: Greedy Function Approximation: A Gradient Boosting Machine, Ann. Stat., 29(5), 1189–1232, doi:10.1017/CBO9781107415324.004, 2001.
- Friedman, J. H.: Stochastic gradient boosting, Comput. Stat. Data Anal., 38(4), 367–378, doi:10.1016/S0167-9473(01)00065-2, 2002.
- Fryjoff-Hung, A. F.: 2D Hydrodynamic Modeling for Evaluating Restoration Potential of a Vernal Pool Complex, University of California, Merced., 2018.
- 610 Georganos, S., Grippa, T., Gadiaga, A. N., Linard, C., Lennert, M., Vanhuyse, S., Mboga, N. O., Wolff, E. and Kalogirou, S.: Geographical Random Forests: A Spatial Extension of the Random Forest Algorithm to Address Spatial Heterogeneity in Remote Sensing and Population Modelling, Geocarto Int., 1–12, doi:10.1080/10106049.2019.1595177, 2019.
- Greenwell, B. M.: pdp: An R Package for Constructing Partial Dependence Plots, R J., 9(1) [online] Available from: <https://github.com/bgreenwell/pdp/issues>. (Accessed 13 June 2019), 2017.
- 615 Guyon, I. and Elisseeff, A.: An Introduction to Variable and Feature Selection, J. Mach. Learn. Res., 3(3), 1157–1182, 2003.
- Guyon, I., Weston, J., Barnhill, S. and Vapnik, V.: Gene selection for cancer classification using support vector machines, Mach. Learn., 389–422, doi:10.1023/A:1012487302797, 2002.
- Hassan-Esfahani, L., Torres-Rua, A., Jensen, A. and McKee, M.: Assessment of surface soil moisture using high-resolution multi-spectral imagery and artificial neural networks, Remote Sens., 7(3), 2627–2646, doi:10.3390/rs70302627, 2015.
- 620 Hastie, T., Tibshirani, R. and Friedman, J.: The Elements of Statistical Learning: Data Mining, Inference, and Prediction,





2nd ed., Springer New York, New York, NY., 2009.

Haubrock, S.-N., Chabrillat, S., Lemmiz, C. and Kaufmann, H.: Surface soil moisture quantification models from reflectance data under field conditions, *Int. J. Remote Sens.*, 29(1), 3–29, doi:10.1080/01431160701294695, 2008.

625 Hengl, T., Mendes de Jesus, J., Heuvelink, G. B. M., Ruiperez Gonzalez, M., Kilibarda, M., Blagotić, A., Shangguan, W., Wright, M. N., Geng, X., Bauer-Marschallinger, B., Guevara, M. A., Vargas, R., MacMillan, R. A., Batjes, N. H., Leenaars, J. G. B., Ribeiro, E., Wheeler, I., Mantel, S. and Kempen, B.: SoilGrids250m: Global gridded soil information based on machine learning, edited by B. Bond-Lamberty, *PLoS One*, 12(2), e0169748, doi:10.1371/journal.pone.0169748, 2017.

Hengl, T., Nussbaum, M., Wright, M. N., Heuvelink, G. B. M. and Gräler, B.: Random forest as a generic framework for predictive modeling of spatial and spatio-temporal variables, *PeerJ*, 6, e5518, doi:10.7717/peerj.5518, 2018.

630 Hillel, D.: *Environmental Soil Physics*, Academic Press, San Diego, CA., 1998.

James, G., Witten, D., Hastie, T. and Tibshirani, R.: *An Introduction to Statistical Learning*, Springer New York, New York, NY., 2013.

Jenness, J., Brost, B. and Beier, P.: *Land Facet Corridor Designer*, (July) [online] Available from: [www.corridordesign.org](http://www.corridordesign.org), 2013.

635 Karatzoglou, A., Smola, A., Hornik, K. and Zeileis, A.: kernlab: An S4 Package for Kernel Methods in R (version 0.9-25), *J. Stat. Softw.*, 11(9), 1–20 [online] Available from: <http://www.jstatsoft.org/v11/i09/>, 2004.

Keskin, H., Grunwald, S. and Harris, W. G.: Digital mapping of soil carbon fractions with machine learning, *Geoderma*, 339, 40–58, doi:10.1016/j.geoderma.2018.12.037, 2019.

640 Kuhn, M.: The caret Package, [online] Available from: <http://topepo.github.io/caret/index.html> (Accessed 1 June 2017), 2017.

Liaw, A. and Wiener, M.: Package “randomForest” (v.4.6-12), *R Packag.*, XXXIX(1), doi:10.5244/C.22.54, 2015.

Malley, D. F., Martin, P. D. and Ben-Dor, E.: Application in Analysis of Soils, in *Near-Infrared Spectroscopy in Agriculture*, edited by R. Craig, R. Windham, and J. Workman, pp. 729–784, American Society of Agronomy, Crop Science Society of America, Soil Science Society of America, Madison, WI, USA., 2004.

645 Matei, O., Rusu, T., Petrovan, A. and Mihaș, G.: A Data Mining System for Real Time Soil Moisture Prediction, *Procedia Eng.*, 181, 837–844, doi:10.1016/j.proeng.2017.02.475, 2017.

Molnar, C.: *Interpretable Machine Learning: A Guide for Making Black Box Models Explainable*. [online] Available from: <https://christophm.github.io/interpretable-ml-book/>, 2019.

650 Muller, E. and Décamps, H.: Modeling soil moisture–reflectance, *Remote Sens. Environ.*, 76(2), 173–180, doi:10.1016/S0034-4257(00)00198-X, 2000.

Natekin, A. and Knoll, A.: Gradient boosting machines, a tutorial, *Front. Neurobot.*, 7(DEC), 1–11, doi:10.3389/fnbot.2013.00021, 2013.



- Nichols, S., Zhang, Y. and Ahmad, A.: Review and evaluation of remote sensing methods for soil-moisture estimation, *J. Photonics Energy*, 2(1), 028001, doi:10.1117/1.3534910, 2011.
- 655 Nussbaum, M., Spiess, K., Baltensweiler, A., Grob, U., Keller, A., Greiner, L., Schaepman, M. E. and Papritz, A.: Evaluation of digital soil mapping approaches with large sets of environmental covariates, *SOIL*, 4(1), 1–22, doi:10.5194/soil-4-1-2018, 2018.
- Ochsner, T. E., Cosh, M. H., Cuenca, R. H., Dorigo, W. a., Draper, C. S., Hagimoto, Y., Kerr, Y. H., Njoku, E. G., Small, E. E. and Zreda, M.: State of the Art in Large-Scale Soil Moisture Monitoring, *Soil Sci. Soc. Am. J.*, 77(6), 1888, doi:10.2136/sssaj2013.03.0093, 2013.
- 660 Pachepsky, Y. A., Timlin, D. and Varallyay, G.: Artificial Neural Networks to Estimate Soil Water Retention from Easily Measurable Data, *Soil Sci. Soc. Am. J.*, 60(3), 727–733, doi:10.2136/sssaj1996.03615995006000030007x, 1996.
- Paloscia, S., Pampaloni, P., Pettinato, S. and Santi, E.: A Comparison of Algorithms for Retrieving Soil Moisture from ENVISAT/ASAR Images, *IEEE Trans. Geosci. Remote Sens.*, 46(10), 3274–3284, doi:10.1109/TGRS.2008.920370, 2008.
- 665 Petropoulos, G. P., Ireland, G. and Barrett, B. W.: Surface soil moisture retrievals from remote sensing: Current status, products & future trends, *Phys. Chem. Earth*, 83–84, 36–56, doi:10.1016/j.pce.2015.02.009, 2015.
- Pix4D: Learn more about Sequoia, [online] Available from: <https://pix4d.com/sequoia-faq/> (Accessed 14 November 2016), n.d.
- Price, J. C.: Thermal inertia mapping: A new view of the earth, *J. Geophys. Res.*, 82, 2582–2590, 1977.
- 670 Price, J. C.: On the analysis of thermal infrared imagery: The limited utility of apparent thermal inertia, *Remote Sens. Environ.*, 18(1), 59–73, doi:10.1016/0034-4257(85)90038-0, 1985.
- R Core Team: R: A Language and Environment for Statistical Computing, [online] Available from: <https://www.r-project.org/>, 2019.
- 675 Rana, G. and Katerji, N.: Measurement and estimation of actual evapotranspiration in the field under Mediterranean climate: a review, *Eur. J. Agron.*, 13(2–3), 125–153, doi:10.1016/S1161-0301(00)00070-8, 2000.
- Ridgeway, G.: Generalized Boosted Models: A guide to the gbm package., 2012.
- Schaap, M. G., Leij, F. J. and van Genuchten, M. T.: Rosetta: A computer program for estimating soil hydraulic parameters with hierarchical pedotransfer functions, *J. Hydrol.*, 251(3–4), 163–176, doi:10.1016/S0022-1694(01)00466-8, 2001.
- Schanda, E.: Physical Fundamentals of Remote Sensing, Springer-Verlag, Berlin, Germany., 1986.
- 680 Seneviratne, S. I., Corti, T., Davin, E. L., Hirschi, M., Jaeger, E. B., Lehner, I., Orlowsky, B. and Teuling, A. J.: Investigating soil moisture-climate interactions in a changing climate: A review, *Earth-Science Rev.*, 99(3–4), 125–161, doi:10.1016/j.earscirev.2010.02.004, 2010.
- Singh, K. K. and Frazier, A. E.: A meta-analysis and review of unmanned aircraft system (UAS) imagery for terrestrial applications, *Int. J. Remote Sens.*, 39(15–16), 5078–5098, doi:10.1080/01431161.2017.1420941, 2018.



- 685 Sobrino, J., Mattar, C., Jiménez-Muñoz, J. C., Franch, B. and Corbari, C.: On the Synergy between Optical and TIR Observations for the Retrieval of Soil Moisture Content, in *Remote Sensing of Energy Fluxes and Soil Moisture Content*, edited by G. P. Petropoulos, pp. 363–390, CRC Press., 2014.
- Sørensen, R., Zinko, U. and Seibert, J.: On the calculation of the topographic wetness index: Evaluation of different methods based on field observations, *Hydrol. Earth Syst. Sci.*, 10(1), 101–112, doi:10.5194/hess-10-101-2006, 2006.
- 690 Spectrum Technologies Inc.: *FieldScout TDR 300 Soil Moisture Meter*, 2009.
- Stark, B., McGee, M. and Chen, Y.: Short wave infrared (SWIR) imaging systems using small Unmanned Aerial Systems (sUAS), in *2015 International Conference on Unmanned Aircraft Systems (ICUAS)*, pp. 495–501, IEEE., 2015.
- Szabó, B., Szatmári, G., Takács, K., Laborczi, A., Makó, A., Rajkai, K. and Pásztor, L.: Mapping soil hydraulic properties using random-forest-based pedotransfer functions and geostatistics, *Hydrol. Earth Syst. Sci.*, 23(6), 2615–2635, doi:10.5194/hess-23-2615-2019, 2019.
- 695 Tian, J., Su, H., He, H. and Sun, X.: An Empirical Method of Estimating Soil Thermal Inertia, *Adv. Meteorol.*, 2015, 1–9, doi:10.1155/2015/428525, 2015.
- Tipping, M. E.: The Relevance Vector Machine, in *Advances in Neural Information Processing Systems 12*, edited by S. A. Solla, T. K. Leen, and K. Muller, pp. 652–658, MIT Press. [online] Available from: <http://papers.nips.cc/paper/1719-the-relevance-vector-machine.pdf>, 2000.
- 700 Torres-Rua, A., Toclavilca, A., Bachour, R. and McKee, M.: Estimation of Surface Soil Moisture in Irrigated Lands by Assimilation of Landsat Vegetation Indices, Surface Energy Balance Products, and Relevance Vector Machines, *Water*, 8(4), 167, doi:10.3390/w8040167, 2016.
- Trenberth, K. E., Fasullo, J. T. and Kiehl, J.: Earth's Global Energy Budget, *Bull. Am. Meteorol. Soc.*, 90(3), 311–323, doi:10.1175/2008BAMS2634.1, 2009.
- 705 Weidong, L., Baret, F., Xingfa, G., Qingxi, T., Lanfen, Z. and Bing, Z.: Relating soil surface moisture to reflectance, *Remote Sens. Environ.*, 81(2–3), 238–246, doi:10.1016/S0034-4257(01)00347-9, 2002.
- Weston, J., Elisseeff, A., Schölkopf, B. and Tipping, M.: Use of the Zero-Norm with Linear Models and Kernel Methods, *J. Mach. Learn. Res.*, 3, 1439–1461, 2003.
- 710 Whiting, M. L., Li, L. and Ustin, S. L.: Predicting water content using Gaussian model on soil spectra, *Remote Sens. Environ.*, 89(4), 535–552, doi:10.1016/j.rse.2003.11.009, 2004.
- Willmott, C. and Matsuura, K.: Advantages of the mean absolute error (MAE) over the root mean square error (RMSE) in assessing average model performance, *Clim. Res.*, 30(1), 79–82, doi:10.3354/cr030079, 2005.
- 715 Wilson, J. P. and Gallant, J. C.: *Digital Terrain Analysis*, in *Terrain Analysis: principles and applications*, edited by J. P. Wilson and J. C. Gallant, pp. 1–21., 2000.
- Wong, K.: Merced Vernal Pools Joins Natural Reserve System, *Univ. Calif. News*, 22nd January [online] Available from: <http://universityofcalifornia.edu/news/merced-vernal-pools-join-natural-reserve-system>, 2014.

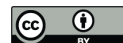

Zaman, B. and Mckee, M.: Spatio-Temporal Prediction of Root Zone Soil Moisture Using Multivariate Relevance Vector Machines, *Open J. Mod. Hydrol.*, 4(3), 80–90, doi:dx.doi.org/10.4236/ojmh.2014.43007, 2014.

720 Zaman, B., McKee, M. and Neale, C. M. U.: Fusion of remotely sensed data for soil moisture estimation using relevance vector and support vector machines, *Int. J. Remote Sens.*, 33(20), 6516–6552, doi:10.1080/01431161.2012.690540, 2012.

Zhang, D. and Zhou, G.: Estimation of Soil Moisture from Optical and Thermal Remote Sensing: A Review, *Sensors*, 16(8), 1308, doi:10.3390/s16081308, 2016.

725 Zhang, Y. and Schaap, M. G.: Weighted recalibration of the Rosetta pedotransfer model with improved estimates of hydraulic parameter distributions and summary statistics (Rosetta3), *J. Hydrol.*, 547, 39–53, doi:10.1016/j.jhydrol.2017.01.004, 2017.

Zhang, Y., Schaap, M. G. and Zha, Y.: A High-Resolution Global Map of Soil Hydraulic Properties Produced by a Hierarchical Parameterization of a Physically Based Water Retention Model, *Water Resour. Res.*, 54(12), 9774–9790, doi:10.1029/2018WR023539, 2018.

730 Zreda, M., Shuttleworth, W. J., Zeng, X., Zweck, C., Desilets, D., Franz, T. and Rosolem, R.: COSMOS: the COsmic-ray Soil Moisture Observing System, *Hydrol. Earth Syst. Sci.*, 16(11), 4079–4099, doi:10.5194/hess-16-4079-2012, 2012.
